# Supplementary material
Source: publisher figshare collection journal article supplement (https://tandf.figshare.com/ndownloader/files/18531440)
Supplement: Supplementary file 1 [file 18531440]

## Sheet: Table S1
Table S1. Summary of the 108 published mNGS studies until 2018.
Bodysites/ organ	Diseases/Cases	sampling	causing pathogen	Sequencing method	sequencing platform	Confirmatory methods	Year of Publication	Study from	study type	Reference (title)	Reference (DOI)
Central nervous system	Fulminant Meningoencephalitis	Cerebrospinal fluid	Leptospira santarosai	Shotgun	Illumina MiSeq	Targeted PCR	2014	USA	Real-time	Actionable diagnosis of neuroleptospirosis by next-generation sequencing	10.1056/NEJMoa1401268.
Central nervous system	Encephalitis	Cerebrospinal fluid	Human herpesvirus 1	Shotgun	Illumina HiSeq	Isothermal linear nucleic acid amplification (Ribo-SPIA, NuGen)	2015	Poland	Proof-of-concept	Next-generation sequencing (NGS) in the identification of encephalitis-causing viruses: Unexpected detection of human herpesvirus 1 while searching for RNA pathogens	10.1016/j.jviromet.
Central nervous system	Encephalitis	Frozen brain Tissue samples	Measles virus , Human herpesvirus 1	Shotgun	Illumina HiSeq	Specific PCR; neuropathological examinations	2014	USA	Proof-of-concept	Deep Sequencing to Identify the Causes of Viral Encephalitis	10.1371/journal.pone.0093993.
Central nervous system	Acute central nervous system infections	Cerebrospinal fluid	Cyclovirus	Shotgun	Roche-454	PCR	2013	Vietnam	Proof-of-concept	Identification of a new cyclovirus in cerebrospinal fluid of patients with acute central nervous system infections	10.1128/mBio.00231-13.
Central nervous system	Encephalitis	Cerebrospinal fluid	Balamuthia mandrillaris	Shotgun	Illumina HiSeq	18S rRNA PCR; immunohistochemistry	2015	USA	Real-time	Diagnosing Balamuthia mandrillaris encephalitis with metagenomic deep sequencing	10.1002/ana.24499.
Central nervous system	Encephalitis	Cerebrospinal fluid, Brain biopsy	Human astrovirus	Shotgun	None mentioned	In situ hybridization of brain tissue using probes derived from the Human astrovirus capsid	2015	USA	Real-time	Diagnosis of Neuroinvasive Astrovirus Infection in an Immunocompromised Adult With Encephalitis by Unbiased Next-Generation Sequencing	10.1093/cid/ciu912.
Central nervous system	Encephalitis	brain biopsy, Cerebrospinal fluid	Balamuthia mandrillaras	Shotgun	Illumina MiSeq	Pathology; targeted PCR	2015	USA	Real-time	Clinical metagenomic identification of Balamuthia mandrillaris encephalitis and assembly of the draft genome: the continuing case for reference genome sequencing	10.1186/s13073-015-0235-2.
Central nervous system	Chronic meningitis	Cerebrospinal fluid	Propionibacterium acnes	Shotgun	Illumina HiSeq	Repeated metagenomics sampling of patient during diagnosis and treatment, and sampling of control patients; Treatment directed at P. acnes resulted in cure of the infection and clinical improvement.	2016	USA	Real-time	High-throughput sequencing of cerebrospinal fluid for diagnosis of chronic Propionibacterium acnes meningitis in an allogeneic stem cell transplant recipient	10.1111/tid.12512.
Central nervous system	Severe encephalitis	Serum, Cerebrospinal fluid	Human pegivirus	Shotgun	None mentioned	Lawrence-Livermore pan-microbial assay; targeted PCR	2016	Denmark	Real-time	Human pegivirus detected in a patient with severe encephalitis using a metagenomic pan-virus array	10.1016/j.jcv.2016.01.013.
Central nervous system	Meningoencephalitis	Serum, Cerebrospinal fluid	Ebola virus	Shotgun	None mentioned	RT-PCR; Serology	2016	UK	Real-time	Late Ebola virus relapse causing meningoencephalitis: a case report	10.1016/S0140-6736(16)30386-5.
Central nervous system	Meningitis	Cerebrospinal fluid	Psychrobacter sp. 310	Shotgun	Roche-454	PCR; 16S rRNA PCR	2016	Mexico	Retrospective	Fatal Psychrobacter sp. infection in a pediatric patient with meningitis identified by metagenomic next-generation sequencing in cerebrospinal fluid	10.1016/S0140-6736(16)30386-5.
Central nervous system	Neuroinflammatory disorders	Tissues (brain or spinal cord biopsies)	Mycobacterium tuberculosis, JC polyomavirus, Epstein-Barr virus	Shotgun	Illumina MiSeq	Pathology	2016	USA	real-time	Next-generation sequencing in neuropathologic diagnosis of infections of the nervous system	10.1212/NXI.0000000000000251.
Central nervous system	Neurobrucellosis	Cerebrospinal fluid	Brucella melitensis	Shotgun	Illumina HiSeq	Targeted PCR; Serology	2016	USA	Real-time	Neurobrucellosis: unexpected answer from metagenomic next-generation sequencing	10.1093/jpids/piw066.
Central nervous system	encephalitis	Urine	Japanese encephalitis virus	Shotgun	Illumina MiSeq	RT-PCR; Serology	2017	Vietnam and UK	Real-time	Central nervous system infection diagnosis by next-generation sequencing: a glimpse into the future?	10.1093/ofid/ofx046.
Central nervous system	Severe and progressive encephalitis	Cerebrospinal fluid	Powassan virus	Shotgun	Illumina MiSeq	Serology; Histopathology	2018	USA	Real-time	Rapid Detection of Powassan Virus in a Patient With Encephalitis by Metagenomic Sequencing	10.1093/cid/cix792.
Central nervous system	Meningoencephalitis	Cerebrospinal fluid	west nile virus	Shotgun	Illumina HiSeq	Serology	2017	USA	Real-time	Acute West Nile Virus Meningoencephalitis Diagnosed Via Metagenomic Deep Sequencing of Cerebrospinal Fluid in a Renal Transplant Patient	10.1111/ajt.14058.
Central nervous system	A lung-transplant patient with meningoencephalitis	Cerebrospinal fluid	hepatitis E virus	Shotgun	Illumina HiSeq	Serology	2017	USA	Real-time	Hepatitis E Virus–associated meningoencephalitis in a lung transplant recipient diagnosed by clinical metagenomic sequencing	10.1093/ofid/ofx121.
Central nervous system	Meningoencephalitis	Cerebrospinal fluid	St. Louis encephalitis virus	Shotgun	Illumina HiSeq	Repeated metagenomics sampling of patient; RT-PCR; viral culture	2017	USA	Real-time	Diagnosis of fatal human case of St. Louis encephalitis virus infection by metagenomic sequencing, California, 2016	10.3201/eid2310.161986.
Central nervous system	Chronic meningoencephalitis	Cerebrospinal fluid , Surplus brain biopsy Tissue	cache valley virus	Shotgun	Illumina HiSeq	RT-PCR; Immunohistochemistry	2017	USA	Real-time	A novel cause of chronic viral meningoencephalitis: Cache Valley virus	10.1002/ana.24982.
Central nervous system	Encephalitis	Brain biopsy	Astrovirus	Shotgun	Roche-454	RT-PCR and antigen detection (IHC)	2010	USA	Real-time	Astrovirus Encephalitis in Boy with X-linked Agammaglobulinemia	10.3201/eid1606.091536.
Central nervous system	Suspected viral meningoencephalitis	Cerebrospinal fluid samples	Herpes simplex virus 1 (HSV-1) was detected in the CSF of two patients, HSV-2 and Human herpes virus type 3 (HHV-3, VZV)	Shotgun	Ion Torrent Proton platform	PCR	2016	China	Real-time	Detection of virus in CSF from the cases with meningoencephalitis by next-generation sequencing	10.1007/s13365-015-0390-7.
Central nervous system	Neurocysticercosis	Cerebrospinal fluid	Taenia solium	Shotgun	Ion Torrent Proton platform	PCR; Sanger sequencing; Antibodies Detection	2018	China	Real-time	Next-Generation Sequencing of Cerebrospinal Fluid for the Diagnosis of Neurocysticercosis	10.3389/fneur.2018.00471.
Central nervous system	Neurobrucellosis	Cerebrospinal fluid	Brucella	Shotgun	Ion Torrent Proton platform	PCR and Sanger validation	2018	China	Real-time	Next-generation sequencing of the cerebrospinal fluid in the diagnosis of neurobrucellosis	10.1016/j.ijid.2017.11.028.
Central nervous system	Acute/subacute Meningoencephalitis	Cerebrospinal fluid	Listeria monocytogenes	Shotgun	Ion Torrent Proton platform	PCR and Sanger validation	2016	China	Real-time	Detection of Listeria monocytogenes in CSF from Three Patients with Meningoencephalitis by Next-Generation Sequencing	10.3988/jcn.2016.12.4.446.
Central nervous system	Acluster of individual cases with similar CNS infection symptoms	Cerebrospinal fluid	Mycobacterium tuberculosis complex, Cryptococcus neoformans, varicella-zoster virus, Pseudomonas aeruginosa	Shotgun	Ion Torrent Proton platform	CSF Xpert, India ink test, PCR confirmation, culture	2017	China	Real-time	Dynamic and direct pathogen loads surveillance to reflect disease progression and therapeutic efficacy in central nervous system infection using a novel semi-quantitive sequencing platform	10.1016/j.jinf.2017.11.002.
Central nervous system		Cerebrospinal fluid	NA	Shotgun	Illumina MiSeq	RT-PCR	2018	USA	Proof-of-concept	Development and Optimization of Metagenomic Next-Generation Sequencing Methods for Cerebrospinal Fluid Diagnostics	10.1128/JCM.00472-18.
Central nervous system	encephalitis	Cerebrospinal fluid	pseudorabies virus	Shotgun	Ion Torrent Proton platform	serology	2018	China	Real-time	Clinical experience and next-generation sequencing analysis of encephalitis caused by pseudorabies virus	10.3760/cma.j.issn.0376-2491.2018.15.006.
Central nervous system	encephalitis	Cerebrospinal fluid	Herpes simplex virus 1 (HSV-1), HSV-2 , Human herpes virus type 3 (HHV-3, VZV)	Shotgun	Ion Torrent Proton platform	PCR	2016	China	Real-time	Detection of virus in CSF from the cases with meningoencephalitis by next-generation sequencing	10.1007/s13365-015-0390-7.
Central nervous system	Primary amoebic meningoencephalitis (PAM)	Cerebrospinal fluid	Naegleria fowleri	Shotgun	BGISEQ-500 platform	PCR	2018	China	Real-time	A case of Naegleria fowleri related primary amoebic meningoencephalitis in China diagnosed by next-generation sequencing	10.1186/s12879-018-3261-z.
Central nervous system	Neurocysticercosis (NCC)	Cerebropinal fluid	Taenia solium	Shotgun	Ion Torrent Proton platform	This finding was confirmed by a positive reaction to CSF cysticercosis antibodies. After antiparasitic treatment, secondary CSF NGS revealed the DNA index have dropped considerably compared to the initial NGS readings	2018	China	Real-time	Next generation sequencing based pathogen analysis in a patient with neurocysticercosis: a case report	10.1186/s12879-018-3015-y.
Central nervous system	Chronic Meningitis	Tissue from lumbar meningeal biopsy	A parasitic worm (Taenia solium, in 2 participants), a virus (HIV-1), and 4 fungi (Cryptococcus neoformans, Aspergillus oryzae, Histoplasma capsulatum, and Candida dubliniensis)	Shotgun	None mentioned	None mentioned	2018	USA	Proof-of-concept	Chronic Meningitis Investigated via Metagenomic Next-Generation Sequencing	10.1001/jamaneurol.2018.0463.
Central nervous system	Meningitis and encephalitis	Cerebrospinal fluid	NA	Shotgun	Illumina HiSeq	None mentioned	2018	USA	Proof-of-concept	Laboratory Validation of a Clinical Metagenomic Sequencing Assay for Pathogen Detection in Cerebrospinal Fluid	10.1101/gr.238170.118.
Central nervous system	Encephalitis	Tissues(brain）	variegated squirrel 1 bornavirus (VSBV-1)	Shotgun	Illumina MiSeq	RTPCR	2015	Germany	retrospective	A Variegated Squirrel Bornavirus Associated with Fatal Human Encephalitis	10.1056/NEJMoa1415627.
Circulatory system	Unknown tropical febrile illness	Serum	Human Herpesvirus 6	Shotgun	Illumina GA II sequencer	Virochip	2012	USA	Proof-of-concept	Virus Identification in Unknown Tropical Febrile Illness Cases Using Deep Sequencing	10.1371/journal.pntd.0001485.
Circulatory system	Undifferentiated type fever	Serum	Yellow fever virus	Shotgun	Roche-454	No specific confirmatory testing is mentioned, though the viral genome was closed via PCR	2012	USA	Real-time	Using next generation sequencing to identify yellow fever virus in Uganda	10.1016/j.virol.2011.08.024.
Circulatory system	Culture-negative infective endocarditis	Tissues (native aortic and mitral valves)	Streptococcus sanguinis, Enterococcus faecalis, Streptococcus mutans	Shotgun	Illumina MiSeq	Culture	2014	japan	Real-time	Comprehensive metagenomic approach for detecting causative microorganisms in culture-negative infective endocarditis	10.1016/j.ijcard.2013.12.197.
Circulatory system	Idiopathic pericarditis	Pericardial Fluids	Torque teno viruses and papillomaviruses	Shotgun	Roche-454	PCR	2014	France	Retrospective	Viral Communities Associated with Human Pericardial Fluids in Idiopathic Pericarditis	10.1371/journal.pone.0093367.
Circulatory system	Infective endocarditis (IE)	Tissues (resected Vegetation)	Abiotrophia defectiva	Shotgun	Illumina MiSeq	None mentioned	2015	japan	Real-time	Metagenomic analysis for detecting pathogens in culture-negative infective endocarditis	10.1016/j.jiac.2015.08.007.
Circulatory system	Bacterial bloodstream infection (bBSI) with severe febrile illness	whole blood	Salmonella enterica, Escherichia coli, Shigella spp.(Shigella flexneri, Shigella sonnei), Neisseria meningitidis, Streptococcus pneumoniae, Morganella morganii, Aeromonas media, Pantoea agglomerans	Targeted 16S rRNA	Illumina MiSeq	Culture; AST	2016	Australia and Belgium	Retrospective	Diagnosis of Bacterial Bloodstream Infections: A 16S Metagenomics Approach	10.1371/journal.pntd.0004470.
Circulatory system	Sepsis	Plasma	Enterobacter cloacae, Staphylococcus aureus, Escherichia coli, Enterococcus faecium, Herpes simplex virus 1 (HSV1), Candida albicans, K. pneumoniae	Shotgun	Illumina HiSeq	Culture	2016	Germany	Retrospective	Nextgeneration sequencing diagnostics of bacteremia in septic patients	10.1186/s13073-016-0326-8.
Circulatory system	Acute febrile illness	Serum	Zika, Chikungunya Viruses	Shotgun	Illumina MiSeq	RT-PCR; Serology	2016	Brazil and USA	Retrospective	Coinfections of Zika and Chikungunya Viruses in Bahia, Brazil, identified by metagenomic next-generation sequencing	10.1128/JCM.00877-16.
Circulatory system	Polymicrobial bacteremia	Whole blood	Staphylococcus, Microbacterium, Janibacter	Targeted 16S rRNA	Illumina MiSeq	None mentioned	2017	France	Retrospective	Identification by Highly Sensitive 16S Metagenomic Sequencing of an Unusual Case of Polymicrobial Bacteremia	10.1016/j.jinf.2017.05.005.
Circulatory system	West Nile fever	Broncheoalveolar lavage (BAL)	West Nile virus	Shotgun	Illumina NextSeq	No specific confirmatory testing is mentioned, though the viral genome was closely related (99.4%–99.6% nucleotide similarity) to a strain from Hungary and other Balkan countries identified between 2010 and 2015	2018	Belgium	Real-time	Use of Next-Generation Sequencing for Diagnosis of West Nile Virus Infection in Patient Returning to Belgium from Hungary	10.3201/eid2412.180494.
Circulatory system	Sepsis	Plasma	Enterococcus faecalis, Enterococcus faecium , Lactococcus lactis , Staphylococcus aureus, Acinetobacter baumannii, Aeromonas hydrophila , Bacteroides fragilis, Citrobacter freundii, Escherichia coli, Klebsiella pneumoniae, Pseudomonas aeruginosa, Fungi Candida albicans	Shotgun	Ion Torrent Proton platform	Culture; Sanger Sequencing	2016	China	Proof-of-concept	Diagnosis of Sepsis with Cell-free DNA by Next-Generation Sequencing Technology in ICU Patients	10.1016/j.arcmed.2016.08.004.
Circulatory system	A two-year-old boy with juvenile myelomonocytic leukemia presenting clinical symptoms including serious rash and hyperpyrexia	Blood	Propionibacterium acnes	Shotgun	Ion Torrent Proton platform	PCR	2016	China	Real-time	Rapid diagnosis of Propionibacterium acnes infection in patient with hyperpyrexia after hematopoietic stem cell transplantation by next-generation sequencing: a case report	10.1186/s12879-015-1306-0.
Circulatory system	Patients with fever of unknown orgin	Blood	Epstein–Barr virus (EBV), P. aeruginosa	Shotgun	Ion Torrent Proton platform	PCR and Sanger sequencing	2015	China	Proof-of-concept	Rapid Detection and Identification of Infectious Pathogens Based on High‑throughput Sequencing	10.4103/0366-6999.154281.
Circulatory system	Sepsis	Blood	NA	16S rRNA gene amplicon sequencing	Illumina MiSeq	culture	2017	China	Proof-of-concept	Comprehensive detection and identification of bacterial DNA in the blood of patients with sepsis and healthy volunteers using next-generation sequencing method - the observation of DNAemia	10.1007/s10096-016-2805-7.
Gastrointestinal system	Diarrhea	Stool	Clostridium difficile, Clostridium perfringens, Norovirus, Sapovirus, Parechovirus, Anellovirus	Shotgun; Targeted 16S rRNA	Roche-454	PCR; Real-time PCR; Culture; WGS	2016	USA	Retrospective	Metagenomic approach for identification of the pathogens associatedwith diarrhea in stool specimens	10.1128/JCM.01965-15.
Gastrointestinal system	Persistent digestive disorders	Stool	NA	Shotgun	Illumina MiSeq	Microscopy, multiplex polymerase chain reaction (PCR)	2016	Switzerland	Proof-of-concept	Metagenomic diagnostics for the simultaneous detection of multiple pathogens in human stool specimens from Côte d’Ivoire: a proof-of-concept study	10.1016/j.meegid.2015.08.044.
Gastrointestinal system	Gastrointestinal basidiobolomycosis (GIB)	Tissues (embedded colon biopsy obtained after hemicolectomy)	Basidiobolus meristosporus	Targeted ITS	Roche-454	Histopathology	2017	France	Real-time	Lavage by Next-Generation Sequencing
Gastrointestinal system	Diarrhea	Stool	Shigella	Shotgun	Illumina HiSeq	qPCR	2018	USA	Proof-of-concept	Direct Detection of Shigella in Stool Specimens by Use of a Metagenomic Approach	10.1128/JCM.01374-17.
Gastrointestinal tract	Diarrheal illness	Stool	Campylobacter jejuni	Shotgun	Roche-454	None mentioned	2008	Japan	real-time	Metagenomic diagnosis of bacterial infections
Hepatobiliary system	Acute cholecystitis	Bile samples	E. coli, K. pneumonia,	Shotgun	Illumina MiSeq	Culture	2017	Japan	Proof-of-concept	Comprehensive Diagnosis of Bacterial Infection Associated with Acute Cholecystitis Using Metagenomic Approach	10.3389/fmicb.2017.00685.
Hepatobiliary system	local hepatic tuberculosis	Liver tissue	Mycobacteria Tuberculosis	Shotgun	Ion Torrent Proton platform	16S rRNA PCR	2018	China	Real-time	Diagnosis of local hepatic tuberculosis through next-generation sequencing: Smarter, faster and better	10.1016/j.clinre.2018.04.007.
Hepatobiliary system	Necrotic hepatic lesion	Hepatic surgical specimen	Brucella melitensis	Shotgun	Illumina MiSeq	Serology; Qpcr	2018	Switzerland	Real-time	When Bacterial Culture Fails, Metagenomics Can Help: A Case of Chronic Hepatic Brucelloma Assessed by Next-Generation Sequencing	10.3389/fmicb.2018.01566.
Hepatobiliary system	Acute Liver Failure	Serum Samples	HAV, HBV, HCV, HDV, HSV-1,parvovirus B19, HHV-7, CMV, and HPV-159,HIV	Shotgun	Illumina HiSeq	Nucleic acid testing (NAT)	2017	USA	Proof-of-concept	Viral Surveillance in Serum Samples From Patients With Acute Liver Failure By Metagenomic Next-Generation Sequencing	10.1093/cid/cix596.
Human musculoskeletal system	Bone and joint infections (BJI)	Solid specimens	NA	Shotgun	Illumina HiSeq	Culture	2017	Switzerland and france	Proof-of-concept	Clinical metagenomics of bone and joint infections: a proof of concept study	10.1038/s41598-017-07546-5.
Human musculoskeletal system	Prosthetic Joint Infection	Sonicate fluid	Mycoplasma salivarium	Shotgun; Targeted 16S rRNA	Illumina HiSeq	16S rRNA PCR	2017	USA	Real-time	A novel prosthetic joint infection pathogen, Mycoplasma salivarium, identified by metagenomic shotgun sequencing	10.1093/cid/cix296.
Human musculoskeletal system	Prosthetic joint infections (PJI)	Sonication fluid	NA	Shotgun	Illumina MiSeq	Culture	2017	UK	Proof-of-concept	Molecular Diagnosis of Orthopedic- Device-Related Infection Directly from Sonication Fluid by Metagenomic Sequencing	10.1128/JCM.00462-17.
Human musculoskeletal system	Prosthetic Joint Infection	Sonicate fluid samples	NA	Shotgun	Illumina HiSeq	culture	2018	USA	Proof-of-concept	Identification of Prosthetic Joint Infection Pathogens Using a Shotgun Metagenomics Approach	10.1093/cid/ciy303.
Human musculoskeletal system	Rheumatoid arthritis (RA) , osteoarthritis (OA)	Synovial Tissue (ST), Synovial fluid	NA	16S rRNA gene amplicon sequencing	Illumina HiSeq	None mentioned	2018	China	proof-of-concept	Detection and characterization of bacterial nucleic acids in culture-negative synovial tissue and fluid samples from rheumatoid arthritis or osteoarthritis patients	10.1038/s41598-018-32675-w.
Human musculoskeletal system	Musculoskeletal infection	Synovial fluid, Deep Tissue	non-tuberculous mycobacterium (NTM):（Mycobacterium abscessus,Mycobacterium smegmatis, Mycobacterium ulcerans）	Shotgun	Ion Torrent Proton platform	All patients were cured through targeted antibiotic and surgeries	2018	China	Real-time	Identification of musculoskeletal infection with non-tuberculous mycobacterium using metagenomic sequencing	10.1016/j.jinf.2018.10.002.
Others	Sparganosis	Mass at the root of the right thigh	Spirometra erinaceieuropaei	Shotgun	Ion Torrent Proton platform	Sanger sequencing and PCR	2018	China	Real-time	Identification of sparganosis based on next-generation sequencing	10.1016/j.meegid.2018.10.005.
Others	Abscess（Abdominal abscess,Brain abscess,Orbital abscess, Cervical lymphadenitis）	Abscess samples	Streptococcus anginosus, Escherichia coli, Bacteroides fragilis, Staphylococcus aureus, Haemophilus influenza	Shotgun	Ion Torrent Proton platform	culture	2018	china	Real-time	The advantages of next-generation sequencing technology in the detection of different sources of abscess	10.1016/j.jinf.2018.08.002.
Others	Patient has a right thumb ulcer, lymphadenopathy of the right axillary lymph node, and pain in the wrist through the right elbow joint	The pus sample from the punctured axillary abscess	Francisella tularensis subsp	Shotgun	Illumina GA II sequencer	None mentioned	2012	Japan	Real-time	Detection of a Possible Bioterrorism Agent, Francisella sp., in a Clinical Specimen by Use of Next-Generation Direct DNA Sequencing	10.1128/JCM.06715-11.
Others ( immune deficiency )	Infection in immunocompromised adults	Blood, Nasopharyngeal swabs, Puncture fluids, Aspirates	HIV,CMV, VZV,Staphylococcus aureus, Pseudomonas spp., Stenotrophomonas maltophilia, Streptococcus spp., Finegoldia magna	Shotgun	Ion Torrent Proton platform	Blood culture, serological diagnosis, antigen detection, PCR, and direct examination of specimens	2018	France	proof-of-concept	Untargeted next-generation sequencing-based first-line diagnosis of infection in immunocompromised adults: a multicentre, blinded, prospective study	10.1016/j.cmi.2017.02.006.
Others (solid-organ)	2 liver transplant , 1 kidney transplants	Tissues( brain, kidney and liver), Cerebrospinal fluid, Serum	new Arenavirus	Shotgun	Roche-454	PT-PCR; Viral culture; EM; immunohistochemistry; serology.	2008	USA	Retrospective	A New Arenavirus in a Cluster of Fatal Transplant-Associated Diseases	10.1056/NEJMoa073785.
Others (solid-organ: neck)	Human tularemia cases	Tissues(lymph node aspirates)	Francisella tularensis,Hepatitis B virus (HBV), Human Parvovirus B-19	Shotgun	Illumina HiSeq	PCR coupled with Sanger sequencing	2018	Turkey,USA,Sweden,Qatar	Retrospective	Coinfections identified from metagenomic analysis of cervical lymph nodes from tularemia patients	10.1186/s12879-018-3218-2.
Respiratory system	Acute lower respiratory tract infections(ALRTIs)	Nasopharyngeal aspirate samples	Human adenovirus (HAdV), Human respiratory syncytial virus (HRSV), Human rhinovirus (HRV), Influenza virus (IFV), Parainfluenza virus (PIV), Human bocavirus (HBoV), Human enterovirus (HEV)	Shotgun	Illumina GA II sequencer	None mentioned	2011	China	Proof-of-concept	Unbiased parallel detection of viral pathogens in clinical samples by use of a metagenomic approach	10.1128/JCM.00273-11.
Respiratory system	Bilateral lung transplantation	Throat swabs, Stool samples	Enterovirus C104	Shotgun	Illumina MiSeq	PCR	2015	Switzerland	Retrospective	Unbiased metagenomic sequencing complements specific routine diagnostic methods and increases chances to detect rare viral strains	10.1016/j.diagmicrobio.2015.06.017.
Respiratory system	NR	Nasopharyngeal swabs	NA	Shotgun	Illumina HiSeq	RT-PCR	2016	USA	Proof-of-concept	Unbiased Detection of Respiratory Viruses by Use of RNA Sequencing-Based Metagenomics: a Systematic Comparison to a Commercial PCR Panel	10.1128/JCM.03060-15.
Respiratory system	Herpes zoster laryngitis	Pus	Varicella zoster virus	Shotgun	Illumina HiSeq	Serology	2016	japan	Real-time	Herpes zoster laryngitis in a patient treated with fingolimod	10.1016/j.jiac.2016.07.011.
Respiratory system	Ventilator-associated pneumonia	Sptume, Stool samples	Klebsiella pneumoniae, Escherichia coli, Enterobacter aerogenes, Pseudomonas aeruginosa, Enterococcus faecium	Shotgun	Illumina HiSeq	Culture; AST	2016	China	Proof-of-concept	Metagenomic Analysis of Sputum Microbiome as a Tool toward Culture-Independent Pathogen Detection of Patients with Ventilator-associated Pneumonia	10.1164/rccm.201601-0034LE.
Respiratory system	Ventilator associated pneumonia	Bronchial aspirate samples	NA	Shotgun; Targeted 16S rRNA	Illumina HiSeq	PCR	2016	USA	Proof-of-concept	Metataxonomic and Metagenomic Approaches vs. Culture-Based Techniques for Clinical Pathology	10.3389/fmicb.2016.00484.
Respiratory system	Influenza-like illness	Nasopharyngeal swabs	NA	Shotgun	Roche-454	Culture; Luminex xTAG respiratory panel	2016	Maryland and Thailand	retrospective	Metagenomics study of viral pathogens in undiagnosed respiratory specimens and identification of Human Enteroviruses at a Thailand hospital	10.4269/ajtmh.16-0062.
Respiratory system	Severe chronic pneumonia	Broncho-alveolar lavage（BAL）	NA	Shotgun	Illumina HiSeq	Culture; PCR	2017	Switzerland	Proof-of-concept	Detection of Bacterial Pathogens from Broncho-Alveolar Lavage by Next-Generation Sequencing	10.3390/ijms18092011.
Respiratory system	Hospital-acquired viral infections	nasal swabs	Human Parainfluenza Virus 3	Shotgun	Illumina MiSeq	RT-PCR: a FilmArray assay (BioFire, Salt Lake City, UT)	2017	USA	Real-time	Rapid metagenomic next-generation sequencing during an Investigation of hospitalacquired Human Parainfluenza Virus 3 infections	10.1128/JCM.01881-16.
Respiratory system	Severe pneumonia	Bronchoalveolar lavage fluid (BALF)	Human rhinovirus B91	Shotgun	Ion Torrent Proton platform	Serology	2017	China	Real-time	Metagenomic analysis identified human Rhinovirus B91 infection in an adult suffering from severe pneumonia	10.1164/rccm.201609-1908LE.
Respiratory system	Hospitalized children diagnosed with acute bronchiolitis, croup, or respiratory tract infections	Throat swabs, Nasopharyngeal swabs, sputum	Human rhinoviruses (HRVs) , Human coronavirus NL63 , Human parainfluenza virus (HPIV),Human parechovirus, influenza A virus, respiratory syncytial virus (RSV),Human metapneumovirus.	Shotgun	Illumina MiSeq	PCR	2017	China	Retrospective	A metagenomics study for the identification of respiratory viruses in mixed clinical specimens: an application of the iterative mapping approach	10.1007/s00705-017-3367-4.
Respiratory system	Community-acquired pneumonia (CAP)	Nasopharyngeal/Oropharyngeal (NP/OP) swabs	NA	Shotgun	Illumina HiSeq	Culture; PCR; Serology; Pan-viral group PCR	2017	USA	Proof-of-concept	Viral Pathogen Detection by Metagenomics and Pan-Viral Group Polymerase Chain Reaction in Children With Pneumonia Lacking Identifiable Etiology	10.1093/infdis/jix148.
Respiratory system	Severe unexplained pneumonia (UP) cases	Oropharyngeal swabs	NA	Shotgun	Illumina HiSeq	Luminex xTAG viral panel	2017	CHINA	Proof-of-concept	Simultaneous virus identification and characterization of severe unexplained pneumonia cases using a metagenomics sequencing technique	10.1007/s11427-016-0244-8.
Respiratory system	lung transplant recipients with unknown etiology of respiratory infection	Throat swabs , Broncho-alveolar lavage	Rhinovirus A, Rhinovirus B	Shotgun	Illumina MiSeq	RT-PCR	2017	Switzerland	Retrospective	Metagenomic sequencing complements routine diagnostics in identifying viral pathogens in lung transplant recipients with unknown etiology of respiratory infection	10.1371/journal.pone.0177340.
Respiratory system	Lower respiratory tract infections	Bronchoscopy, Bronchoalveolar lavage (BAL)	Human metapneumovirus(HMPV),Stenotrophomonas maltophila,respiratory syncytial virus(RSV),Human rhinovirus (HRV),Human herpesvirus-6 (HHV-6)	Shotgun	Illumina HiSeq	Conventional microbiologic assays	2018	USA	Proof-of-concept	Metagenomic Sequencing Detects Respiratory Pathogens in Hematopoietic Cellular Transplant Patients	10.1164/rccm.201706-1097LE.
Respiratory system	Severe pneumonia or acute respiratory distress syndrome (ARDS)	Bronchoalveolar lavage (BAL) specimens	Chlamydophila psittaci	Shotgun	Illumina HiSeq	16S rRNA sequencing; PCR; serology	2014	Germany	real-time	Rapid Metagenomic Diagnostics for Suspected Outbreak of Severe Pneumonia	10.3201/eid2006.131526.
Respiratory system	URTIs and LRTIs	Nasopharyngeal aspirates/wash, Nasopharyngeal swab, Bronchoalveolar lavage, tracheal aspirates, sputum, Throat swabs, Nasal swabs.	NA	Shotgun	Illumina MiSeq	None mentioned	2018	Kuwait	Proof-of-concept	Metagenomic analysis of viral diversity in respiratory samples from patients with respiratory tract infections in Kuwait	10.1002/jmv.24984.
Respiratory system	NR	Cerebrospinal fluid , Respiratory samples	NA	Shotgun	Illumina HiSeq	None mentioned	2018	UK	Proof-of-concept	Oxford Screening CSF and Respiratory samples (‘OSCAR’): results of a pilot study to screen clinical samples from a diagnostic microbiology laboratory for viruses using Illumina next generation sequencing	10.1186/s13104-018-3234-8.
Respiratory system	NR (hospitalized patients)	Nasopharyngeal swabs, Aspirates, Sputums	NA	Shotgun	Illumina NextSeq	real-time PCR	2018	France	Proof-of-concept	Quality control implementation for universal characterization of DNA and RNA viruses in clinical respiratory samples using single metagenomic next-generation sequencing workflow	10.1186/s12879-018-3446-5.
Respiratory system	Pneumocystis pneumonia (PCP)	Bronchoalveolar lavage fluid (BALF), Sputum samples, Blood	Pneumocystis jiroveci	Shotgun	Ion Torrent Proton platform	Sputum smear, clinical evaluation	2018	China	Retrospective	A cluster of cases of pneumocystis pneumonia identified by Shotgun metagenomics approach	10.1016/j.jinf.2018.08.013.
Respiratory system	Pulmonary infections in immunocompromised children	Bronchoalveolar lavages (BAL)	NA	Shotgun	Illumina HiSeq	PCR	2018	USA	Retrospective	Pulmonary Metagenomic Sequencing Suggests Missed Infections in Immunocompromised Children	10.1093/cid/ciy802.
Respiratory system	Suspected of acute or chronic infection	Blood,Sputum,Plasma,BALF,Tissue	NA	Shotgun	Ion Torrent Proton platform	culture	2018	China	Proof-of-concept	Microbiological Diagnostic Performance of Metagenomic Next-generation Sequencing When Applied to Clinical Practice	10.1093/cid/ciy693.
Respiratory system	Severe pneumonia	Sputum, Blood, BAL fluid samples	NA	Shotgun	None mentioned	culture	2018	China	Proof-of-concept	Comparison the pathogen diagnosis of severe pneumonia by using next generation sequencing and traditional detection methods，China，2010-2018	10.1016/j.jinf.2018.09.004
Respiratory system	Community-acquired pneumonia	BAL fluid samples	Pneumocystis jiroveci, Aspergillus fumigatus,CMV	Shotgun	None mentioned	Culture; PCR; serology	2018	China	Proof-of-concept	Next-generation sequencing of the BALF in the diagnosis of community-acquired pneumonia in immunocompromised patients	10.1016/j.jinf.2018.11.005.
Respiratory system	Acute respiratory distress syndrome (ARDS)	Pulmonary secretions	rhinovirus C and bocavirus 1	Shotgun	Ion Torrent Proton platform	(RT-)qPCR assays; antiviral treatment	2018	China	Real-time	Metagenomic analysis identified co-infection with human rhinovirus C and bocavirus 1 in an adult suffering from severe pneumonia	10.1016/j.jinf.2017.10.012.
Respiratory system	Severe pneumonia	Bronchoalveolar lavage fluid	Human adenovirus (HAdV) species B3 and B7 subtype	NR	None mentioned	PCR	2018	china	Real-time	Metagenomics facilitated complete genome sequencing of adenovirus untyped by real-time PCR	10.1016/j.jinf.2018.04.008.
Respiratory system	Pulmonary infection	Lung biopsy Tissues	NA	Shotgun	BGISEQ-500 platform	Culture and smear	2018	china	Proof-of-concept	Detection of Pulmonary Infectious Pathogens From Lung Biopsy Tissues by Metagenomic Next-Generation Sequencing	10.3389/fcimb.2018.00205.
Respiratory system/gastrointestinal system	Flu /a large-scale norovirus outbreak	Nasopharyngeal aspirates and Stools (n = 3 and 5, respectively)	Seasonal influenza A virus and norovirus	Shotgun	Roche-454	None mentioned	2009	Japan	Retrospective	Direct Metagenomic Detection of Viral Pathogens in Nasal and Fecal Specimens Using an Unbiased High-Throughput Sequencing Approach	10.1371/journal.pone.0004219.
Skin	Pyoderma gangrenosum	Tissue swabs of pus blister	Exclude infection	Shotgun	None mentioned	None mentioned	2018	China	Real-time	Usefulness of metagenomic analysis in differential diagnosis for pyoderma gangrenosum	10.1177/0300060518780124.
Skin	Cutaneous Ulcer Syndrome	Ulcer swabs	Treponema pallidum subsp pertenue, Haemophilus ducreyi	Shotgun	Illumina HiSeq	real-time PCR	2018	Spain	proof-of-concept	Etiological Characterization of the Cutaneous Ulcer Syndrome in Papua New Guinea Using Shotgun Metagenomics	10.1093/cid/ciy502.
Skin	Merkel cell carcinoma	Cutaneous swabs obtained from the skin surface of facial areas (forehead and eyebrows)	Human Polyomavirus	Shotgun	Illumina HiSeq	PCR, Sanger sequencing	2011	France	Proof-of-concept	Human Polyomavirus Related to African Green Monkey Lymphotropic Polyomavirus	10.3201/eid1708.110278.
Urinary system	Overactive bladder syndrome (OAB)	Urine	NA	Targeted 16S rDNA	Roche-454	Urinalysis; Culture	2014	Norway	Real-time	Pathogens in urine from a female patient with overactive bladder syndrome detected by culture-independent high throughput sequencing: a case report	10.2174/1874285801408010148.
Urinary system	Urinary tract infections	Urine	Enterobacter cloacae, Escherichia coli, Klebsiella pneumoniae, Staphylococcus aureus, Proteus mirabilis, Morganella morganii, Pseudomonas aeruginosa.	Shotgun	Ion Torrent Proton platform	Culture; WGS	2017	Netherlands and USA	Proof-of-concept	Metagenomic sequencing to replace semi-quantitative urine culture for detection of urinary tract infections: a proof of concept	https://doi.org/10.1101/178178
Visual system	Bilateral chronic uveitis; Anterior and intermediate uveitis; Panuveitis	Intraocular fluid	Cryptococcus neoformans, Toxoplasma gondii, Herpes simplex virus 1, Rubella virus	Shotgun	Illumina HiSeq	PCR	2016	USA	Proof-of-concept	Illuminating uveitis: metagenomic deep sequencing identifies common and rare pathogens	10.1186/s13073-016-0344-6.
Visual system	Lymphatic filariasis (LF)	Eye discharge, Subcutaneous abdominal Tissue	Brugia malayi	Shotgun	Illumina HiSeq	None mentioned	2016	China	Real-time	Diagnosis of a malayan filariasis case using a shotgun diagnostic metagenomics assay	10.1186/s13071-016-1363-2.
Visual system	Intraocular infections	vitreous sample	T. gondii, cytomegalovirus (CMV), herpes simplex virus (HSV),	Shotgun	Illumina HiSeq	PCR	2017	USA	Retrospective	Metagenomic DNA sequencing for the diagnosis of intraocular infections	10.1016/j.ophtha.2017.03.045.
Visual system	Keratitis	14 penetrating keratoplasties, an enucleation due to perforation of a corneal ulcer, and one small limbal biopsy.	Acanthamoeba, mycobacterial, cytomegalovirus	Shotgun	Illumina NextSeq	Culture, PCR, direct staining	2017	China and USA	Retrospective	Identifying corneal infections in formalin-fixed specimens using next generation sequencing	10.1167/iovs.17-21617.
Visual system	Endophthalmitis	Human Ocular Body Fluid	Staphylococcus epidermidis, Enterococcus faecalis, Serratia marcescens , Paenibacillus spp, Staphylococcus hominis,E. coli,Moraxella catarrhalis	Shotgun	Illumina MiSeq	MALDI-TOF mass spectrometry; culture	2018	Denmark	Proof-of-concept	Genomics-Based Identification of Microorganisms in Human Ocular Body Fluid	10.1038/s41598-018-22416-4.
Visual system	Infectious keratitis	Formalin-Fixed Specimens	cytomegalovirus,S. aureus,S. agalactiae,HSV-1,Mycobacterium abscessus,A. algerae	Shotgun	Illumina NextSeq	Culture; PCR; direct staining;direct immunofluorescence	2018	China and USA	retrospective	Identifying Corneal Infections in Formalin-Fixed Specimens Using Next Generation Sequencing	10.1167/iovs.17-21617.
Visual system	Human Endophthalmitis	Vitreous humor	Pseudorabies Virus	Shotgun	Ion Torrent Proton platform	Sanger sequencing and PCR analysis	2018	China	Real-time	Human Endophthalmitis Caused By Pseudorabies Virus Infection, China, 2017	10.3201/eid2406.171612.
NR, not reported; NA, not applicable

## Sheet: Table S2
Table S2. The references cited in figure 2.
Year	References
1997-2003	[1] Riesenfeld C S, Schloss P D, Handelsman J. Metagenomics: Genomic Analysis of Microbial Communities[J]. Annual Review of Genetics, 2004,38(1):525-552. DOI:10.1146/annurev.genet.38.072902.091216 [2] Hughes D S, Felbeck H, Stein J L. A histidine protein kinase homolog from the endosymbiont of the hydrothermal vent tubeworm Riftia pachyptila[J]. Applied and Environmental Microbiology, 1997,63(9):…
2003-2005	[1] DeLong E F. Microbial population genomics and ecology: the road ahead[J]. Environmental Microbiology, 2004,6(9):875-878. DOI: 10.1111/j.1462-2920.2004.00668.x [2] Venter J C, Remington K, Heidelberg J F, et al. Environmental Genome Shotgun Sequencing of the Sargasso Sea[J]. Science, 2004,304(5667):66-74. DOI: 10.1126/science.1093857 [3] Tyson G W, Chapman J, Hugenholtz P, et al. Community str…
2008	[1] Palacios G, Druce J, Du L, et al. A new arenavirus in a cluster of fatal transplant-associated diseases[J]. N Engl J Med, 2008,358(10):991-998. DOI: 10.1056/NEJMoa073785
2009	Nakamura S, Yang C S, Sakon N, et al. Direct metagenomic detection of viral pathogens in nasal and fecal specimens using an unbiased high-throughput sequencing approach[J]. PLoS One, 2009,4(1):e4219. DOI: 10.1371/journal.pone.0004219
2010	[1] Quan P L, Wagner T A, Briese T, et al. Astrovirus encephalitis in boy with X-linked agammaglobulinemia[J]. Emerg Infect Dis, 2010,16(6):918-925. DOI: 10.3201/eid1606.091536
2011	[1] Al Masalma M, Lonjon M, Richet H, et al. Metagenomic Analysis of Brain Abscesses Identifies Specific Bacterial Associations[J]. Clinical Infectious Diseases, 2011,54(2):202-210. DOI: 10.1093/cid/cir797
2012	[1] Yozwiak N L, Skewes-Cox P, Stenglein M D, et al. Virus identification in unknown tropical febrile illness cases using deep sequencing[J]. PLoS Negl Trop Dis, 2012,6(2):e1485. DOI: 10.1371/journal.pntd.0001485
2013	[1] Alquezar-Planas D E, Mourier T, Bruhn C A W, et al. Discovery of a divergent HPIV4 from respiratory secretions using second and third generation metagenomic sequencing[J]. Scientific Reports, 2013,3(1). DOI: 10.1038/srep02468
2014	Wilson M R, Naccache S N, Samayoa E, et al. Actionable diagnosis of neuroleptospirosis by next-generation sequencing[J]. 2014,370(25):2408-2417. DOI: 10.1056/NEJMoa1401268
2015	Quick J, Ashton P, Calus S, et al. Rapid draft sequencing and real-time nanopore sequencing in a hospital outbreak of Salmonella[J]. Genome Biology, 2015,16(1). DOI: 10.1186/s13059-015-0677-2
2016	http:// clinicalmetagenomics.org
2017	[1] Thoendel M, Jeraldo P, Greenwood-Quaintance K E, et al. A Novel Prosthetic Joint Infection Pathogen, Mycoplasma salivarium, Identified by Metagenomic Shotgun Sequencing[J]. Clinical Infectious Diseases, 2017,65(2):332-335. DOI: 10.1093/cid/cix296
2018	[1] Kafetzopoulou L E, Pullan S T, Lemey P, et al. Metagenomic sequencing at the epicenter of the Nigeria 2018 Lassa fever outbreak[J]. Science, 2019,363(6422):74-77. DOI: 10.1126/science.aau9343 [2] Miller S, Naccache S, Samayoa E, et al. Laboratory Validation of a Clinical Metagenomic Sequencing Assay for Pathogen Detection in Cerebrospinal Fluid[J]. bioRxiv, 2018.
